# Supplementary material for: Extracellular vesicles from prostate tumors reshape the pre-metastatic bone environment in an mTOR/RAB1A-dependent manner
Source: Front Immunol. 2025 Sep 19;16:1605494. doi: 10.3389/fimmu.2025.1605494 (PMC12491827; doi:10.3389/fimmu.2025.1605494)
Supplement: Supplementary Table 2 — Flow antibodies. [file Table2.xlsx]

## Sheet: Table S3
ID	Experimental	Control	log2FoldChange	pvalue	padj	gene_name	gene_chr	gene_start	gene_end	gene_strand	gene_length	gene_biotype	gene_description
ENSMUSG00000020125	6363.54	2109.37	1.59311	3.23e-37	4.2e-33	Elane	10	79886247	79888215	+	984	protein_coding	Neutrophil elastase [Source:UniProtKB/Swiss-Prot;Acc:Q3UP87]
ENSMUSG00000022150	1235.66	222.489	2.4735	2.48e-34	1.62e-30	Dab2	15	6299788	6440712	+	7342	protein_coding	DAB2, clathrin adaptor protein [Source:HGNC Symbol;Acc:HGNC:2662]
ENSMUSG00000057729	6089.73	1747.58	1.80085	4.59e-33	1.99e-29	Prtn3	10	79874476	79883174	+	1732	protein_coding	proteinase 3 [Source:MGI Symbol;Acc:MGI:893580]
ENSMUSG00000070348	664.08	96.7443	2.77697	8.65e-32	2.82e-28	Ccnd1	7	144929931	144939925	-	4709	protein_coding	G1/S-specific cyclin-D1 [Source:UniProtKB/Swiss-Prot;Acc:P25322]
ENSMUSG00000035373	1315.21	140.143	3.22709	3.2e-31	8.33e-28	Ccl7	11	82045712	82047525	+	801	protein_coding	C-C motif chemokine 7 [Source:UniProtKB/Swiss-Prot;Acc:Q03366]
ENSMUSG00000032915	83.3594	795.202	-3.25201	1.85e-27	4.02e-24	Adgre4	17	55749984	55853662	+	3491	protein_coding	Adhesion G protein-coupled receptor E4 [Source:UniProtKB/Swiss-Prot;Acc:Q91ZE5]
ENSMUSG00000009350	28353.6	8723.05	1.70062	6.23e-27	1.16e-23	Mpo	11	87793581	87804413	+	3424	protein_coding	Myeloperoxidase Myeloperoxidase light chain Myeloperoxidase heavy chain [Source:UniProtKB/Swiss-Prot;Acc:P11247]
ENSMUSG00000040314	5967.77	1742.96	1.77553	1.04e-22	1.7e-19	Ctsg	14	56099881	56102574	-	1033	protein_coding	cathepsin G [Source:MGI Symbol;Acc:MGI:88563]
ENSMUSG00000027199	1130.37	353.543	1.67678	1.64e-22	2.37e-19	Gatm	2	122594467	122611303	-	3001	protein_coding	Glycine amidinotransferase, mitochondrial [Source:UniProtKB/Swiss-Prot;Acc:Q9D964]
ENSMUSG00000024681	3055.4	884.343	1.78836	3.43e-22	4.47e-19	Ms4a3	19	11629496	11640851	-	1884	protein_coding	Membrane-spanning 4-domains subfamily A member 3 [Source:UniProtKB/Swiss-Prot;Acc:Q920C4]
ENSMUSG00000025491	2706.27	942.773	1.52079	6.57e-19	7.78e-16	Ifitm1	7	140967221	140969825	+	1094	protein_coding	Interferon-induced transmembrane protein 1 [Source:UniProtKB/Swiss-Prot;Acc:Q9D103]
ENSMUSG00000029304	1178.42	373.826	1.65675	2.24e-16	2.43e-13	Spp1	5	104435118	104441050	+	1648	protein_coding	secreted phosphoprotein 1 [Source:MGI Symbol;Acc:MGI:98389]
ENSMUSG00000020053	312.084	1431.12	-2.1964	3.13e-16	3.14e-13	Igf1	10	87858265	87937042	+	9904	protein_coding	Insulin-like growth factor I [Source:UniProtKB/Swiss-Prot;Acc:P05017]
ENSMUSG00000076564	182.795	599.414	-1.7128	4.9e-16	4.28e-13	Igkv12-46	6	69764523	69765022	-	377	IG_V_gene
ENSMUSG00000000794	288.271	34.4492	3.06152	4.93e-16	4.28e-13	Kcnn3	3	89520164	89675132	+	10451	protein_coding	Small conductance calcium-activated potassium channel protein 3 [Source:UniProtKB/Swiss-Prot;Acc:P58391]
ENSMUSG00000069515	158.32	535.068	-1.75703	1.07e-15	8.69e-13	Lyz1	10	117287797	117292868	-	1263	protein_coding	Lysozyme C-1 [Source:UniProtKB/Swiss-Prot;Acc:P17897]
ENSMUSG00000069919	131.618	641.546	-2.28372	1.99e-15	1.52e-12	Hba-a1	11	32283511	32284465	+	812	protein_coding	hemoglobin alpha, adult chain 1 [Source:MGI Symbol;Acc:MGI:96015]
ENSMUSG00000068220	3984.78	1824.47	1.12719	3.49e-15	2.52e-12	Lgals1	15	78926725	78930465	+	903	protein_coding	Galectin-1 [Source:UniProtKB/Swiss-Prot;Acc:P16045]
ENSMUSG00000014361	452.98	1294.07	-1.51384	2.07e-14	1.42e-11	Mertk	2	128698956	128802894	+	4336	protein_coding	Tyrosine-protein kinase Mer [Source:UniProtKB/Swiss-Prot;Acc:Q60805]
ENSMUSG00000021477	4851.12	2229.16	1.12186	3.01e-14	1.96e-11	Ctsl	13	64359337	64370890	-	6489	protein_coding	cathepsin L [Source:MGI Symbol;Acc:MGI:88564]
ENSMUSG00000062515	75.9888	487.954	-2.6817	7.94e-14	4.7e-11	Fabp4	3	10204088	10208576	-	4489	protein_coding	Fatty acid-binding protein, adipocyte [Source:UniProtKB/Swiss-Prot;Acc:P04117]
ENSMUSG00000027533	2476.81	5850.07	-1.23983	1.1e-13	6.25e-11	Fabp5	3	10012548	10016607	+	3567	protein_coding	Fatty acid-binding protein, epidermal [Source:UniProtKB/Swiss-Prot;Acc:Q05816]
ENSMUSG00000022346	2198.31	785.222	1.48513	1.32e-13	7.18e-11	Myc	15	61985391	61990374	+	2717	protein_coding	myelocytomatosis oncogene [Source:MGI Symbol;Acc:MGI:97250]
ENSMUSG00000050621	470.271	1062.16	-1.17559	3.72e-13	1.93e-10	Rps27rt	9	114982366	114982739	-	374	protein_coding	ribosomal protein S27, retrogene [Source:MGI Symbol;Acc:MGI:3704345]
ENSMUSG00000050953	335.246	49.723	2.74726	4.28e-13	2.14e-10	Gja1	10	56377330	56402513	+	10257	protein_coding	gap junction protein, alpha 1 [Source:MGI Symbol;Acc:MGI:95713]
ENSMUSG00000035835	750.896	236.046	1.66908	5.81e-13	2.8e-10	Plppr3	10	79860475	79874634	-	4357	protein_coding	phospholipid phosphatase related 3 [Source:HGNC Symbol;Acc:HGNC:23497]
ENSMUSG00000024640	2000.08	865.342	1.20869	7.71e-13	3.58e-10	Psat1	19	15904678	15947337	-	4254	protein_coding	phosphoserine aminotransferase 1 [Source:MGI Symbol;Acc:MGI:2183441]
ENSMUSG00000035105	884.251	278.649	1.66653	1.2e-12	5.38e-10	Egln3	12	54178981	54203860	-	2662	protein_coding	egl-9 family hypoxia inducible factor 3 [Source:HGNC Symbol;Acc:HGNC:14661]
ENSMUSG00000028527	279.294	62.6509	2.15389	2.84e-12	1.23e-09	Ak4	4	101419277	101466995	+	4646	protein_coding	Adenylate kinase 4, mitochondrial [Source:UniProtKB/Swiss-Prot;Acc:Q9WUR9]
ENSMUSG00000029275	775.356	315.815	1.29635	3.41e-12	1.43e-09	Gfi1	5	107716657	107726036	-	3187	protein_coding	growth factor independent 1 transcriptional repressor [Source:HGNC Symbol;Acc:HGNC:4237]
ENSMUSG00000067149	1252.86	3554.59	-1.50434	5.13e-12	2.09e-09	Jchain	5	88519809	88527891	-	2517	protein_coding	Immunoglobulin J chain [Source:UniProtKB/Swiss-Prot;Acc:P01592]
ENSMUSG00000096842	530.474	175.472	1.59623	9.9e-12	3.79e-09	Gm10736	13	111593534	111593611	-	78	processed_pseudogene	predicted gene 10736 [Source:MGI Symbol;Acc:MGI:3704412]
ENSMUSG00000020649	2887.72	1387.38	1.0577	1.17e-11	4.37e-09	Rrm2	12	24708241	24714146	+	2771	protein_coding	Ribonucleoside-diphosphate reductase subunit M2 [Source:UniProtKB/Swiss-Prot;Acc:P11157]
ENSMUSG00000076940	392.728	1258.99	-1.68001	2.19e-11	7.91e-09	Iglv2	16	19260401	19260859	-	366	IG_V_gene	Ig lambda-2 chain V region [Source:UniProtKB/Swiss-Prot;Acc:P01728]
ENSMUSG00000104452	212.818	815.517	-1.93739	2.74e-11	9.64e-09	Ighv8-8	12	115294062	115294504	-	358	IG_V_gene
ENSMUSG00000033307	2426.83	1134.35	1.09692	4.77e-11	1.63e-08	Mif	10	75859353	75860240	-	745	protein_coding	macrophage migration inhibitory factor (glycosylation-inhibiting factor) [Source:MGI Symbol;Acc:MGI:96982]
ENSMUSG00000004098	253.504	632.568	-1.31875	6.24e-11	2.03e-08	Col5a3	9	20770050	20815067	-	6809	protein_coding	collagen, type V, alpha 3 [Source:MGI Symbol;Acc:MGI:1858212]
ENSMUSG00000032232	212.398	54.264	1.96761	1.77e-10	5.24e-08	Cgnl1	9	71626509	71771602	-	7844	protein_coding	cingulin like 1 [Source:HGNC Symbol;Acc:HGNC:25931]
ENSMUSG00000020323	313.047	101.321	1.62852	1.93e-10	5.59e-08	Prss57	10	79781474	79790961	-	2843	protein_coding	Serine protease 57 [Source:UniProtKB/Swiss-Prot;Acc:Q14B24]
ENSMUSG00000096594	201.5	760.469	-1.91536	2.12e-10	5.99e-08	Igkv8-19	6	70340876	70341453	-	370	IG_V_gene
ENSMUSG00000076934	1327.89	2960.23	-1.15632	2.63e-10	7.28e-08	Iglv1	16	19085017	19085500	-	391	IG_V_gene
ENSMUSG00000031765	713.434	269.382	1.40403	2.84e-10	7.57e-08	Mt1	8	94179082	94180327	+	1246	protein_coding	Metallothionein-1 [Source:UniProtKB/Swiss-Prot;Acc:P02802]
ENSMUSG00000105906	1189.47	2459.87	-1.04798	2.89e-10	7.57e-08	Iglc1	16	19061618	19062071	-	454	IG_C_gene
ENSMUSG00000026437	383.774	142.23	1.43141	4.09e-10	1.02e-07	Cdk18	1	132112237	132139684	-	4764	protein_coding	Cyclin-dependent kinase 18 [Source:UniProtKB/Swiss-Prot;Acc:Q04899]
ENSMUSG00000017861	942.716	424.235	1.15223	4.22e-10	1.04e-07	Mybl2	2	163054687	163084688	+	4632	protein_coding	Myb-related protein B [Source:UniProtKB/Swiss-Prot;Acc:P48972]
ENSMUSG00000013089	403.778	148.833	1.43923	8.13e-10	1.96e-07	Etv5	16	22381309	22439719	-	4103	protein_coding	ETS translocation variant 5 [Source:UniProtKB/Swiss-Prot;Acc:Q9CXC9]
ENSMUSG00000001227	394.216	132.23	1.57429	1.1e-09	2.6e-07	Sema6b	17	56123085	56140343	-	3977	protein_coding	sema domain, transmembrane domain (TM), and cytoplasmic domain, (semaphorin) 6B [Source:MGI Symbol;Acc:MGI:1202889]
ENSMUSG00000050578	238.204	54.0886	2.14057	1.55e-09	3.54e-07	Mmp13	9	7272514	7283331	+	2673	protein_coding	Collagenase 3 [Source:UniProtKB/Swiss-Prot;Acc:P33435]
ENSMUSG00000017493	1915.36	686.581	1.48007	2.05e-09	4.61e-07	Igfbp4	11	99041244	99054392	+	4416	protein_coding	Insulin-like growth factor-binding protein 4 [Source:UniProtKB/Swiss-Prot;Acc:P47879]
ENSMUSG00000022157	253.301	654.651	-1.36912	2.15e-09	4.75e-07	Mcpt8	14	56082166	56085273	-	998	protein_coding	Mast cell protease 8 [Source:UniProtKB/Swiss-Prot;Acc:P43430]
ENSMUSG00000038390	47.4659	203.612	-2.10164	2.35e-09	5.01e-07	Gpr162	6	124858444	124863983	-	3838	protein_coding	G protein-coupled receptor 162 [Source:MGI Symbol;Acc:MGI:1315214]
ENSMUSG00000026669	816.58	380.672	1.10093	4.08e-09	8.44e-07	Mcm10	2	4989714	5012791	-	7692	protein_coding	minichromosome maintenance 10 replication initiation factor [Source:HGNC Symbol;Acc:HGNC:18043]
ENSMUSG00000020826	168.02	17.4181	3.25944	4.98e-09	9.97e-07	Nos2	11	78920787	78960254	+	4412	protein_coding	Nitric oxide synthase, inducible [Source:UniProtKB/Swiss-Prot;Acc:P29477]
ENSMUSG00000004612	376.25	136.941	1.45659	5.05e-09	9.97e-07	Nkg7	7	43437073	43438249	+	914	protein_coding	natural killer cell granule protein 7 [Source:HGNC Symbol;Acc:HGNC:7830]
ENSMUSG00000019987	119.321	14.7426	3.01021	7.75e-09	1.46e-06	Arg1	10	24915221	24927484	-	2228	protein_coding	Arginase-1 [Source:UniProtKB/Swiss-Prot;Acc:Q61176]
ENSMUSG00000029762	1048.02	475.835	1.1386	8.46e-09	1.57e-06	Akr1b8	6	34354119	34368463	+	1499	protein_coding	Aldose reductase-related protein 2 [Source:UniProtKB/Swiss-Prot;Acc:P45377]
ENSMUSG00000028583	195.513	37.4804	2.37757	1.07e-08	1.93e-06	Pdpn	4	143267431	143299564	-	1817	protein_coding	Podoplanin [Source:UniProtKB/Swiss-Prot;Acc:Q62011]
ENSMUSG00000076594	43.384	194.128	-2.16432	1.68e-08	2.75e-06	Igkv6-13	6	70457501	70458036	-	359	IG_V_gene
ENSMUSG00000042745	378.477	145.131	1.38446	1.69e-08	2.75e-06	Id1	2	152736251	152737410	+	1160	protein_coding	inhibitor of DNA binding 1 [Source:MGI Symbol;Acc:MGI:96396]
ENSMUSG00000095630	172.27	446.436	-1.37463	1.73e-08	2.75e-06	Igkv6-23	6	70260409	70260955	-	369	IG_V_gene
ENSMUSG00000027315	183.014	50.8361	1.84645	1.79e-08	2.8e-06	Spint1	2	119237362	119249527	+	2767	protein_coding	Kunitz-type protease inhibitor 1 [Source:UniProtKB/Swiss-Prot;Acc:Q9R097]
ENSMUSG00000023067	1846.68	855.827	1.10915	1.89e-08	2.93e-06	Cdkn1a	17	29090979	29100722	+	2223	protein_coding	Cyclin-dependent kinase inhibitor 1 [Source:UniProtKB/Swiss-Prot;Acc:P39689]
ENSMUSG00000015854	126.356	1116.52	-3.14323	1.95e-08	2.99e-06	Cd5l	3	87357881	87371073	+	2036	protein_coding	CD5 antigen-like [Source:UniProtKB/Swiss-Prot;Acc:Q9QWK4]
ENSMUSG00000095204	119.507	344.677	-1.52776	3.17e-08	4.48e-06	Ighv1-52	12	115145487	115145919	-	351	IG_V_gene
ENSMUSG00000105987	5264.12	2620.06	1.00652	3.54e-08	4.95e-06	AI506816	5	23698296	23712667	-	4479	processed_transcript	expressed sequence AI506816 [Source:MGI Symbol;Acc:MGI:2140929]
ENSMUSG00000005413	21696.6	10826.6	1.00283	3.7e-08	5.07e-06	Hmox1	8	75093621	75100589	+	1751	protein_coding	Heme oxygenase 1 [Source:UniProtKB/Swiss-Prot;Acc:P14901]
ENSMUSG00000015970	578.527	274.541	1.07571	4.53e-08	5.96e-06	Chdh	14	30009023	30040527	+	6217	protein_coding	Choline dehydrogenase, mitochondrial [Source:UniProtKB/Swiss-Prot;Acc:Q8BJ64]
ENSMUSG00000076580	108.122	284.856	-1.39802	6.06e-08	7.55e-06	Igkv8-27	6	70171809	70172270	-	360	IG_V_gene
ENSMUSG00000035385	3162.97	449.877	2.81337	6.55e-08	8.04e-06	Ccl2	11	82035571	82037453	+	1138	protein_coding	C-C motif chemokine 2 [Source:UniProtKB/Swiss-Prot;Acc:P10148]
ENSMUSG00000056399	961.536	2328.61	-1.27577	7.14e-08	8.69e-06	Prss34	17	25298394	25300161	+	1216	protein_coding	protease, serine 34 [Source:MGI Symbol;Acc:MGI:2681414]
ENSMUSG00000094006	204.233	479.525	-1.23097	8.54e-08	1.03e-05	Igkv4-59	6	69438218	69438757	-	368	IG_V_gene
ENSMUSG00000071547	1581.59	741.402	1.09278	9.29e-08	1.1e-05	Nt5dc2	14	31131053	31139124	+	2378	protein_coding	5'-nucleotidase domain containing 2 [Source:HGNC Symbol;Acc:HGNC:25717]
ENSMUSG00000079339	395.751	846.966	-1.09838	1.11e-07	1.28e-05	Ifit1bl1	19	34592888	34601968	-	2275	protein_coding	interferon induced protein with tetratricpeptide repeats 1B like 1 [Source:MGI Symbol;Acc:MGI:3650685]
ENSMUSG00000042817	325.278	122.987	1.40227	1.27e-07	1.4e-05	Flt3	5	147330741	147400489	-	6176	protein_coding	fms related tyrosine kinase 3 [Source:HGNC Symbol;Acc:HGNC:3765]
ENSMUSG00000017499	736.492	349.935	1.07356	1.48e-07	1.62e-05	Cdc6	11	98907801	98923940	+	5229	protein_coding	Cell division control [Source:UniProtKB/Swiss-Prot;Acc:O89033]
ENSMUSG00000076437	647.888	316.831	1.03115	2.34e-07	2.46e-05	Selenoh	2	84669215	84670770	-	1131	protein_coding	Selenoprotein H [Source:UniProtKB/Swiss-Prot;Acc:Q3UQA7]
ENSMUSG00000021253	274.219	627.83	-1.19504	2.56e-07	2.64e-05	Tgfb3	12	86056745	86079041	-	3383	protein_coding	transforming growth factor, beta 3 [Source:MGI Symbol;Acc:MGI:98727]
ENSMUSG00000058392	975.421	475.345	1.03689	2.88e-07	2.88e-05	Rrp1b	17	32036100	32062865	+	7702	protein_coding	Ribosomal RNA processing B [Source:UniProtKB/Swiss-Prot;Acc:Q91YK2]
ENSMUSG00000007682	511.713	213.277	1.26299	3.07e-07	3.03e-05	Dio2	12	90724552	90738438	-	5815	protein_coding	Type II iodothyronine deiodinase [Source:UniProtKB/Swiss-Prot;Acc:Q9Z1Y9]
ENSMUSG00000061815	237.111	66.764	1.82955	3.6e-07	3.47e-05	Rufy4	1	74125541	74148223	+	2329	protein_coding	RUN and FYVE domain-containing protein 4 [Source:UniProtKB/Swiss-Prot;Acc:Q3TYX8]
ENSMUSG00000026829	61.6175	192.777	-1.64541	3.75e-07	3.59e-05	Gbgt1	2	28496891	28505415	+	1337	protein_coding	Globoside alpha-1,3-N-acetylgalactosaminyltransferase 1 [Source:UniProtKB/Swiss-Prot;Acc:Q8VI38]
ENSMUSG00000096422	111.766	313.002	-1.48695	3.79e-07	3.6e-05	Igkv12-44	6	69814631	69815154	-	401	IG_V_gene
ENSMUSG00000076522	146.007	339.326	-1.21694	4.36e-07	4.06e-05	Igkv16-104	6	68425575	68426072	+	378	IG_V_gene
ENSMUSG00000016028	374.158	158.153	1.24229	4.58e-07	4.17e-05	Celsr1	15	85898929	86033777	-	11007	protein_coding	Cadherin EGF LAG seven-pass G-type receptor 1 [Source:UniProtKB/Swiss-Prot;Acc:O35161]
ENSMUSG00000040950	98.6259	288.685	-1.55033	4.61e-07	4.17e-05	Mgl2	11	70130329	70137550	+	2094	protein_coding
ENSMUSG00000004110	2742.52	5638.11	-1.03957	5.54e-07	4.84e-05	Cacna1e	1	154390731	154884501	-	25228	protein_coding	calcium voltage-gated channel subunit alpha1 E [Source:HGNC Symbol;Acc:HGNC:1392]
ENSMUSG00000026837	259.9	62.2951	2.05915	5.84e-07	5.04e-05	Col5a1	2	27886425	28039514	+	8490	protein_coding	Collagen alpha-1(V) chain [Source:UniProtKB/Swiss-Prot;Acc:O88207]
ENSMUSG00000030255	161.39	371.589	-1.20238	6.18e-07	5.25e-05	Sspn	6	145931641	145965223	+	4996	protein_coding	sarcospan [Source:MGI Symbol;Acc:MGI:1353511]
ENSMUSG00000001473	701.745	307.966	1.18701	8.11e-07	6.64e-05	Tubb6	18	67390717	67402748	+	1757	protein_coding	tubulin, beta 6 class V [Source:MGI Symbol;Acc:MGI:1915201]
ENSMUSG00000030110	124.534	326.026	-1.38718	1.1e-06	8.76e-05	Ret	6	118151745	118197718	-	6763	protein_coding	Proto-onco tyrosine-protein kinase receptor Ret Soluble RET kinase fragment Extracellular cell-membrane anchored RET cadherin 120 kDa fragment [Source:UniProtKB/Swiss-Prot;Acc:P35546]
ENSMUSG00000096715	185.967	404.213	-1.12022	1.2e-06	9.45e-05	Igkv3-4	6	70671788	70672377	+	360	IG_V_gene
ENSMUSG00000031562	270.067	92.5329	1.54461	1.26e-06	9.84e-05	Dctd	8	48099092	48153233	+	3409	protein_coding	dCMP deaminase [Source:HGNC Symbol;Acc:HGNC:2710]
ENSMUSG00000004709	340.543	143.797	1.24237	1.32e-06	0.000101133	Cd244	1	171559193	171609746	+	4876	protein_coding	Natural killer cell receptor 2B4 [Source:UniProtKB/Swiss-Prot;Acc:Q07763]
ENSMUSG00000003824	386.488	168.715	1.19505	2.25e-06	0.000160796	Syce2	8	84872111	84888221	+	1968	protein_coding	Synaptonemal complex central element protein 2 [Source:UniProtKB/Swiss-Prot;Acc:Q505B8]
ENSMUSG00000073940	28.4891	170.653	-2.57887	2.26e-06	0.000160796	Hbb-bt	7	103812524	103813996	-	703	protein_coding
ENSMUSG00000024177	198.904	74.9705	1.40722	2.28e-06	0.000161342	Nme4	17	26091734	26095508	-	1418	protein_coding	Nucleoside diphosphate kinase, mitochondrial [Source:UniProtKB/Swiss-Prot;Acc:Q9WV84]
ENSMUSG00000022416	524.454	1177.27	-1.16698	2.87e-06	0.000197611	Cacna1i	15	80287238	80398279	+	9862	protein_coding	calcium channel, voltage-dependent, alpha 1I subunit [Source:MGI Symbol;Acc:MGI:2178051]
ENSMUSG00000015599	145.518	348.517	-1.26074	3.08e-06	0.000211091	Ttbk1	17	46442448	46487675	-	14097	protein_coding	tau tubulin kinase 1 [Source:MGI Symbol;Acc:MGI:2147036]
ENSMUSG00000076614	2582.19	5171.64	-1.00193	3.4e-06	0.000229639	Ighg1	12	113325240	113330523	-	2592	IG_C_gene
ENSMUSG00000025227	667.52	332.723	1.0043	3.99e-06	0.000265326	Mfsd13a	19	46341121	46375252	+	2804	protein_coding	Transmembrane protein 180 [Source:UniProtKB/Swiss-Prot;Acc:Q6PDE8]
ENSMUSG00000038732	190.435	55.5837	1.7757	4.36e-06	0.000282165	Mboat1	13	30136489	30246717	+	3659	protein_coding	membrane bound O-acyltransferase domain containing 1 [Source:MGI Symbol;Acc:MGI:2387184]
ENSMUSG00000068129	655.728	291.481	1.16911	4.37e-06	0.000282165	Cst7	2	150570415	150578944	+	986	protein_coding	Cystatin-F [Source:UniProtKB/Swiss-Prot;Acc:O89098]
ENSMUSG00000045094	88.5217	221.659	-1.32503	4.38e-06	0.000282165	Arhgef37	18	61493794	61536536	-	3234	protein_coding	Rho guanine nucleotide exchange factor 37 [Source:HGNC Symbol;Acc:HGNC:34430]
ENSMUSG00000053113	1090.72	462.063	1.23815	5.05e-06	0.000318886	Socs3	11	117966079	117970047	-	2891	protein_coding	suppressor of cytokine signaling 3 [Source:MGI Symbol;Acc:MGI:1201791]
ENSMUSG00000001270	567.636	221.561	1.35705	5.16e-06	0.000319631	Ckb	12	111669361	111672338	-	2895	protein_coding	Creatine kinase B-type [Source:UniProtKB/Swiss-Prot;Acc:Q04447]
ENSMUSG00000018906	89.8209	17.1705	2.3818	5.25e-06	0.000319631	P4ha2	11	54100095	54131665	+	6239	protein_coding	Prolyl 4-hydroxylase subunit alpha-2 [Source:UniProtKB/Swiss-Prot;Acc:Q60716]
ENSMUSG00000042215	228.067	82.182	1.4726	5.98e-06	0.00034931	Bag2	1	33745484	33757795	-	3059	protein_coding	BAG family molecular chaperone regulator 2 [Source:UniProtKB/Swiss-Prot;Acc:Q91YN9]
ENSMUSG00000037994	59.7631	2.81968	4.38575	6.36e-06	1	Slc9b2	3	135307700	135345387	+	5497	protein_coding	Sodium/hydrogen exchanger 9B2 [Source:UniProtKB/Swiss-Prot;Acc:Q5BKR2]
ENSMUSG00000045349	497.24	219.39	1.1815	6.62e-06	0.000379637	Sh2d5	4	138250403	138261332	+	3740	protein_coding	SH2 domain-containing protein 5 [Source:UniProtKB/Swiss-Prot;Acc:Q8JZW5]
ENSMUSG00000076556	149.296	321.512	-1.10747	6.78e-06	0.000383961	Igkv4-57	6	69575975	69576500	-	352	IG_V_gene
ENSMUSG00000028528	213.46	76.5017	1.47859	6.83e-06	0.000384397	Dnajc6	4	101496648	101642799	+	5909	protein_coding	DnaJ heat shock protein family (Hsp40) member C6 [Source:MGI Symbol;Acc:MGI:1919935]
ENSMUSG00000028926	384.77	187.967	1.03367	6.86e-06	0.000384397	Cdk14	5	4803391	5420312	-	18877	protein_coding	Cyclin-dependent kinase 14 [Source:UniProtKB/Swiss-Prot;Acc:O35495]
ENSMUSG00000044026	178.157	65.723	1.43718	6.88e-06	0.000384397	Slc35g1	19	38395980	38405607	+	3471	protein_coding	Solute carrier family 35 member G1 [Source:UniProtKB/Swiss-Prot;Acc:Q8BY79]
ENSMUSG00000042453	559.261	1299.95	-1.21637	7.39e-06	0.000406086	Reln	5	21884454	22344702	-	23738	protein_coding	Reelin [Source:UniProtKB/Swiss-Prot;Acc:Q60841]
ENSMUSG00000054675	108.728	18.6705	2.54041	8.3e-06	0.000451608	Tmem119	5	113793729	113800516	-	2315	protein_coding	Transmembrane protein 119 [Source:UniProtKB/Swiss-Prot;Acc:Q8R138]
ENSMUSG00000028356	69.1579	11.4951	2.58531	8.63e-06	0.0004637	Ambp	4	63143275	63154799	-	1409	protein_coding	Protein AMBP Alpha-1-microglobulin Inter-alpha-trypsin inhibitor light chain Trypstatin [Source:UniProtKB/Swiss-Prot;Acc:Q07456]
ENSMUSG00000000318	69.0396	180.112	-1.384	1.14e-05	0.000573091	Clec10a	11	70156197	70170834	+	2899	protein_coding	C-type lectin domain family 10 member A [Source:UniProtKB/Swiss-Prot;Acc:P49300]
ENSMUSG00000038227	286.749	100.384	1.51311	1.14e-05	0.000573091	Hoxa9	6	52223100	52231089	-	5580	protein_coding	Homeobox protein Hox-A9 [Source:UniProtKB/Swiss-Prot;Acc:P09631]
ENSMUSG00000092203	382.541	189.787	1.01172	1.23e-05	0.000602534	1110038B12Rik	17	34950238	34952471	-	1811	processed_transcript	RIKEN cDNA 1110038B12 gene [Source:MGI Symbol;Acc:MGI:1916013]
ENSMUSG00000052861	40.4822	133.703	-1.72161	1.33e-05	0.000648618	Dnah6	6	73017606	73221651	-	13247	protein_coding	dynein axonemal heavy chain 6 [Source:HGNC Symbol;Acc:HGNC:2951]
ENSMUSG00000031821	270.187	118.735	1.18448	1.35e-05	0.000648618	Gins2	8	120578633	120589304	-	4097	protein_coding	DNA replication complex GINS protein PSF2 [Source:UniProtKB/Swiss-Prot;Acc:Q9D600]
ENSMUSG00000099775	20.0726	87.723	-2.12695	1.48e-05	0.000699668	Gm5960	15	75071112	75074638	+	406	unprocessed_pseudogene	predicted gene 5960 [Source:MGI Symbol;Acc:MGI:3779540]
ENSMUSG00000062148	40.1451	123.275	-1.61882	1.67e-05	0.000754143	Ear6	14	51853699	51854643	+	945	protein_coding
ENSMUSG00000006345	140.306	44.9131	1.64424	1.73e-05	0.000776197	Ggt1	10	75561604	75586200	+	3411	protein_coding	Glutathione hydrolase 1 proenzyme Glutathione hydrolase 1 heavy chain Glutathione hydrolase 1 light chain [Source:UniProtKB/Swiss-Prot;Acc:Q60928]
ENSMUSG00000020010	82.7697	199.787	-1.27063	1.78e-05	0.000790503	Vnn3	10	23851462	23869843	+	1811	protein_coding	vanin 3 [Source:MGI Symbol;Acc:MGI:1347055]
ENSMUSG00000035352	63.895	9.45903	2.74496	1.83e-05	0.000809422	Ccl12	11	82101845	82103400	+	537	protein_coding	C-C motif chemokine 12 [Source:UniProtKB/Swiss-Prot;Acc:Q62401]
ENSMUSG00000113669	67.0486	195.849	-1.5452	1.95e-05	0.00083987	AC163354.1	12	25303940	25471979	+	6803	lincRNA
ENSMUSG00000105606	81.8252	195.566	-1.25757	2.06e-05	0.000877523	Igkv2-109	6	68302427	68303158	+	374	IG_V_gene
ENSMUSG00000006442	1244.84	595.651	1.06339	2.11e-05	0.000891467	Srm	4	148591503	148594993	+	1599	protein_coding	spermidine synthase [Source:MGI Symbol;Acc:MGI:102690]
ENSMUSG00000025270	25.9928	124.28	-2.25356	2.34e-05	0.00097314	Alas2	X	150547375	150570638	+	2403	protein_coding	5-aminolevulinate synthase, erythroid-specific, mitochondrial [Source:UniProtKB/Swiss-Prot;Acc:P08680]
ENSMUSG00000069792	1223.02	575.714	1.08643	2.48e-05	0.0010171	Wfdc17	11	83703991	83706268	+	533	protein_coding	WAP four-disulfide core domain 17 [Source:MGI Symbol;Acc:MGI:3649773]
ENSMUSG00000030069	405.685	146.53	1.46677	2.63e-05	0.0010681	Prok2	6	99711299	99726392	-	1917	protein_coding	prokineticin 2 [Source:MGI Symbol;Acc:MGI:1354178]
ENSMUSG00000095700	81.6901	193.354	-1.24271	2.82e-05	0.0011257	Ighv10-3	12	114523441	114523905	-	377	IG_V_gene
ENSMUSG00000078521	173.923	71.1869	1.28842	2.99e-05	0.00116587	Aunip	4	134510999	134523927	+	1275	protein_coding	Aurora kinase A and ninein-interacting protein [Source:UniProtKB/Swiss-Prot;Acc:E9Q6Z5]
ENSMUSG00000076535	806.961	1700.95	-1.0755	3.05e-05	0.00117797	Igkv1-88	6	68862265	68863031	-	362	IG_V_gene
ENSMUSG00000051243	73.8802	188.364	-1.3488	3.16e-05	0.00121073	Islr2	9	58196297	58204319	-	5921	protein_coding	Immunoglobulin superfamily containing leucine-rich repeat protein 2 [Source:UniProtKB/Swiss-Prot;Acc:Q5RKR3]
ENSMUSG00000070323	236.973	97.2181	1.28726	3.3e-05	0.00124687	Mmp27	9	7571396	7581885	+	2210	protein_coding	matrix metallopeptidase 27 [Source:HGNC Symbol;Acc:HGNC:14250]
ENSMUSG00000095007	80.2734	188.251	-1.22979	3.45e-05	0.00128926	Igkv12-41	6	69858420	69858884	-	347	IG_V_gene	Ig kappa chain V-V region K2 [Source:UniProtKB/Swiss-Prot;Acc:P01635]
ENSMUSG00000027454	242.405	112.172	1.11207	4.1e-05	0.00149145	Gins1	2	150905400	150931280	+	1516	protein_coding	DNA replication complex GINS protein PSF1 [Source:UniProtKB/Swiss-Prot;Acc:Q9CZ15]
ENSMUSG00000094164	46.3694	144.967	-1.6464	4.29e-05	0.00153897	Ighv2-3	12	113611187	113611617	-	347	IG_V_gene
ENSMUSG00000017400	161.475	341.507	-1.08165	4.52e-05	0.00159301	Stac2	11	98036623	98053462	-	3139	protein_coding	SH3 and cysteine-rich domain-containing protein 2 [Source:UniProtKB/Swiss-Prot;Acc:Q8R1B0]
ENSMUSG00000015112	255.443	113.42	1.17132	4.87e-05	0.00167903	Slc25a13	6	6041218	6217173	-	3798	protein_coding	solute carrier family 25 (mitochondrial carrier, adenine nucleotide translocator), member 13 [Source:MGI Symbol;Acc:MGI:1354721]
ENSMUSG00000015852	82.5339	20.7426	1.993	5.06e-05	0.00173394	Fcrls	3	87250758	87263738	-	2334	protein_coding
ENSMUSG00000076587	48.107	168.133	-1.80796	5.28e-05	0.00178201	Igkv6-20	6	70335841	70336507	-	375	IG_V_gene
ENSMUSG00000053553	308.745	136.833	1.17294	6.3e-05	0.00207751	3110082I17Rik	5	139359739	139460527	-	2885	protein_coding	Uncharacterized [Source:UniProtKB/Swiss-Prot;Acc:Q9CXL3]
ENSMUSG00000095200	86.5314	206.231	-1.25434	6.89e-05	0.00223611	Ighv1-7	12	114538495	114538965	-	388	IG_V_gene
ENSMUSG00000076534	83.3433	207.189	-1.31278	7.37e-05	0.0023557	Igkv12-89	6	68834846	68835307	-	338	IG_V_gene
ENSMUSG00000076569	396.219	814.892	-1.03988	7.99e-05	0.00249359	Igkv5-39	6	69900424	69900977	-	347	IG_V_gene
ENSMUSG00000094433	278.112	656.792	-1.23933	0.000101004	0.00299538	Igkv5-43	6	69823355	69823943	-	379	IG_V_gene
ENSMUSG00000096490	115.729	247.036	-1.09482	0.000104658	0.00307571	Igkv10-94	6	68704508	68704978	-	347	IG_V_gene
ENSMUSG00000040658	145.365	58.764	1.30725	0.000116701	0.00334654	Dnph1	17	46496789	46499618	+	1106	protein_coding	2'-deoxynucleoside 5'-phosphate N-hydrolase 1 [Source:UniProtKB/Swiss-Prot;Acc:Q80VJ3]
ENSMUSG00000053219	77.7433	20.5262	1.91698	0.000122509	0.0034396	Raet1e	10	22158569	22374139	+	2159	protein_coding	Retinoic acid early-inducible protein 1-epsilon [Source:UniProtKB/Swiss-Prot;Acc:Q9CZQ6]
ENSMUSG00000004558	180.586	81.7902	1.14248	0.000125032	0.00347415	Ndrg2	14	51905271	51914158	-	3397	protein_coding	Protein NDRG2 Protein NDRG2, N-terminally processed [Source:UniProtKB/Swiss-Prot;Acc:Q9QYG0]
ENSMUSG00000094561	140.001	302.438	-1.10982	0.000130598	0.003572	Ighv1-22	12	114746273	114746706	-	351	IG_V_gene
ENSMUSG00000023274	96.5512	232.782	-1.27001	0.000130873	0.003572	Cd4	6	124864692	124888221	-	4032	protein_coding	T-cell surface glycoprotein CD4 [Source:UniProtKB/Swiss-Prot;Acc:P06332]
ENSMUSG00000079543	65.9528	169.53	-1.36376	0.000152475	0.00402651	Igkv13-85	6	68930269	68930734	-	347	IG_V_gene
ENSMUSG00000027670	20.2584	0	6.83597	0.000182051	1	Ocstamp	2	165393760	165400405	-	3657	protein_coding	Osteoclast stimulatory transmembrane protein [Source:UniProtKB/Swiss-Prot;Acc:Q9D611]
ENSMUSG00000066363	205.414	512.415	-1.31893	0.000217842	0.00531102	Serpina3f	12	104214544	104221129	+	2290	protein_coding	Serine protease inhibitor A3F [Source:UniProtKB/Swiss-Prot;Acc:Q80X76]
ENSMUSG00000111877	233.263	116.095	1.00582	0.000241193	0.00575108	Gm6477	10	39198538	39199301	+	764	processed_pseudogene	predicted gene 6477 [Source:MGI Symbol;Acc:MGI:3647945]
ENSMUSG00000089901	69.3598	159.374	-1.1992	0.000252605	0.00596855	Gm8113	14	43925390	43933411	+	2721	protein_coding
ENSMUSG00000022218	225.675	82.0738	1.4581	0.000263204	0.00615197	Tgm1	14	55700009	55713926	-	3162	protein_coding	transglutaminase 1 [Source:HGNC Symbol;Acc:HGNC:11777]
ENSMUSG00000037907	175.811	73.4345	1.25918	0.000282533	0.00645808	Ankrd13b	11	77470485	77489678	-	3839	protein_coding	Ankyrin repeat domain-containing protein 13B [Source:UniProtKB/Swiss-Prot;Acc:Q5F259]
ENSMUSG00000102918	96.3815	30.6295	1.65206	0.000282749	0.00645808	Pcdhgc3	18	37806364	37841873	+	5499	protein_coding	protocadherin gamma subfamily C, 3 [Source:MGI Symbol;Acc:MGI:1935201]
ENSMUSG00000032373	60.1832	10.0672	2.57878	0.000307386	0.00688789	Car12	9	66713686	66766845	+	7597	protein_coding	carbonic anhydrase 12 [Source:HGNC Symbol;Acc:HGNC:1371]
ENSMUSG00000035678	135.397	55.5476	1.2833	0.000328106	0.00720762	Tnfsf9	17	57105385	57107757	+	1230	protein_coding	tumor necrosis factor (ligand) superfamily, member 9 [Source:MGI Symbol;Acc:MGI:1101058]
ENSMUSG00000053318	278.45	593.302	-1.09119	0.000367812	0.00788547	Slamf8	1	172581758	172590568	-	3079	protein_coding	SLAM family member 8 [Source:MGI Symbol;Acc:MGI:1921998]
ENSMUSG00000041688	289.768	130.59	1.14984	0.0003811	0.00806755	Amot	X	145446425	145505181	-	8402	protein_coding	Angiomotin [Source:UniProtKB/Swiss-Prot;Acc:Q8VHG2]
ENSMUSG00000053897	154.677	65.9705	1.22719	0.000382814	0.00807756	Slc39a8	3	135825279	135888572	+	7664	protein_coding	Zinc transporter ZIP8 [Source:UniProtKB/Swiss-Prot;Acc:Q91W10]
ENSMUSG00000078452	43.6873	8.10329	2.42476	0.000435268	1	Raet1d	10	22360552	22374139	+	1441	protein_coding	Mus musculus retinoic acid early transcript beta (Raet1b), mRNA. [Source:RefSeq mRNA;Acc:NM_009017]
ENSMUSG00000004655	109.978	238.133	-1.11512	0.000437203	0.00899201	Aqp1	6	55336432	55348555	+	2627	protein_coding	Aquaporin-1 [Source:UniProtKB/Swiss-Prot;Acc:Q02013]
ENSMUSG00000066235	110.837	42.341	1.38865	0.000445922	0.00905688	Pomgnt2	9	121981606	121997110	-	2903	protein_coding	Protein O-linked-mannose beta-1,4-N-acetylglucosaminyltransferase 2 [Source:UniProtKB/Swiss-Prot;Acc:Q8BW41]
ENSMUSG00000013155	179.101	87.0378	1.04062	0.000452278	0.00917166	Enkd1	8	105703651	105708210	-	3659	protein_coding	Enkurin domain-containing protein 1 [Source:UniProtKB/Swiss-Prot;Acc:Q7TSV9]
ENSMUSG00000045875	11.2338	66.2377	-2.55473	0.000465763	0.00937213	Adra1a	14	66635251	66771168	+	8728	protein_coding	Alpha-1A adrenergic receptor [Source:UniProtKB/Swiss-Prot;Acc:P97718]
ENSMUSG00000097134	37.0077	110.446	-1.57877	0.000472162	0.00947161	1110002J07Rik	10	66912489	66920258	-	2513	lincRNA	RIKEN cDNA 1110002J07 gene [Source:MGI Symbol;Acc:MGI:1915738]
ENSMUSG00000030329	6.6796	41.3459	-2.62754	0.000485975	1	Pianp	6	124996694	125003096	+	2851	protein_coding	PILR alpha-associated neural protein [Source:UniProtKB/Swiss-Prot;Acc:Q6P1B3]
ENSMUSG00000041774	184.295	69.0738	1.41385	0.000555309	0.0107423	Ydjc	16	17146967	17148857	+	1320	protein_coding	YdjC homolog (bacterial) [Source:MGI Symbol;Acc:MGI:1916351]
ENSMUSG00000018417	213.158	86.6361	1.29602	0.000573872	0.0109609	Myo1b	1	51749765	51916071	-	10792	protein_coding	myosin IB [Source:MGI Symbol;Acc:MGI:107752]
ENSMUSG00000050108	163.582	69.8624	1.22612	0.000595354	0.0113317	Bpifc	10	85959340	86011895	-	2848	protein_coding	BPI fold containing family C [Source:HGNC Symbol;Acc:HGNC:16503]
ENSMUSG00000043424	150.562	60.5427	1.31108	0.000693796	0.0126931	Eif3j2	18	43475418	43477796	-	2379	protein_coding	Eukaryotic translation initiation factor 3 subunit J-B [Source:UniProtKB/Swiss-Prot;Acc:Q66JS6]
ENSMUSG00000030410	213.158	101.069	1.07605	0.000711361	0.0128986	Dmwd	7	19076227	19082776	+	2556	protein_coding	Dystrophia myotonica WD repeat-containing protein [Source:UniProtKB/Swiss-Prot;Acc:Q08274]
ENSMUSG00000096632	52.728	143.076	-1.43983	0.000780855	0.013926	Igkv9-124	6	67942074	67942540	-	353	IG_V_gene
ENSMUSG00000027401	25.6388	93.4082	-1.86237	0.000784405	0.0139701	Tgm3	2	130012349	130050399	+	4135	protein_coding	Protein-glutamine gamma-glutamyltransferase E Protein-glutamine gamma-glutamyltransferase E 50 kDa catalytic chain Protein-glutamine gamma-glutamyltransferase E 27 kDa non-catalytic chain [Source:UniProtKB/Swiss-Prot;Acc:Q08189]
ENSMUSG00000026730	111.849	43.1295	1.37775	0.000821283	0.0145276	Pter	2	12924041	13003455	+	4682	protein_coding	Phosphotriesterase-related protein [Source:UniProtKB/Swiss-Prot;Acc:Q60866]
ENSMUSG00000094356	74.2856	161.117	-1.11811	0.00085291	0.0149852	Igkv8-28	6	70143593	70144166	-	370	IG_V_gene
ENSMUSG00000086221	1.02893	22.0984	-4.42531	0.000942918	1	4930412B13Rik	2	117821928	117909136	+	1276	lincRNA	RIKEN cDNA 4930412B13 gene [Source:MGI Symbol;Acc:MGI:1921188]
ENSMUSG00000005397	123.422	248.335	-1.00972	0.001001	0.0170354	Nid1	13	13437551	13512269	+	6943	protein_coding	Nidogen-1 [Source:UniProtKB/Swiss-Prot;Acc:P10493]
ENSMUSG00000070498	29.8727	82.6099	-1.46855	0.00101784	0.0172426	Tmem132b	5	125531774	125792583	+	8238	protein_coding	transmembrane protein 132B [Source:HGNC Symbol;Acc:HGNC:29397]
ENSMUSG00000094951	118.545	286.656	-1.27331	0.00105672	0.0177287	Ighv5-6	12	113625506	113625956	-	353	IG_V_gene
ENSMUSG00000105652	158.91	66.2902	1.25928	0.0011734	0.0193145	4930519L02Rik	3	143017660	143040752	+	891	lincRNA	RIKEN cDNA 4930519L02 gene [Source:MGI Symbol;Acc:MGI:1922335]
ENSMUSG00000031760	13.4774	0	6.2481	0.00118983	1	Mt3	8	94152607	94154146	+	1066	protein_coding	Metallothionein-3 [Source:UniProtKB/Swiss-Prot;Acc:P28184]
ENSMUSG00000076545	296.109	1343.82	-2.18199	0.00119857	0.0195786	Igkv4-72	6	69226854	69227433	-	402	IG_V_gene
ENSMUSG00000053846	885.108	134.612	2.71665	0.00120374	0.0195906	Lipg	18	74939322	74961263	-	3787	protein_coding	Endothelial lipase [Source:UniProtKB/Swiss-Prot;Acc:Q9WVG5]
ENSMUSG00000017754	143.73	294.777	-1.03556	0.00140855	0.0219615	Pltp	2	164839518	164857711	-	2562	protein_coding	phospholipid transfer protein [Source:MGI Symbol;Acc:MGI:103151]
ENSMUSG00000022755	216.9	96.5689	1.16761	0.00150796	0.0229347	Adgrg7	16	56724609	56795855	-	2698	protein_coding	Adhesion G-protein coupled receptor G7 [Source:UniProtKB/Swiss-Prot;Acc:Q8BM96]
ENSMUSG00000032011	379.925	182.7	1.05533	0.0015151	0.0230165	Thy1	9	44043384	44048579	+	2995	protein_coding	Thy-1 membrane glycoprotein [Source:UniProtKB/Swiss-Prot;Acc:P01831]
ENSMUSG00000096150	37.0246	97.3476	-1.39603	0.0015792	0.0237578	Ighv1-85	12	116000028	116000461	-	351	IG_V_gene
ENSMUSG00000024112	54.0272	119.915	-1.1511	0.00158681	0.0238004	Cacna1h	17	25374285	25433783	-	9763	protein_coding	voltage-dependent T-type calcium channel subunit alpha-1H isoform 2 [Source:RefSeq peptide;Acc:NP_001157163]
ENSMUSG00000085913	32.3015	86.4345	-1.41807	0.00166366	0.0246128	Gm15601	14	45563834	45598512	+	4323	antisense	predicted gene 15601 [Source:MGI Symbol;Acc:MGI:3783048]
ENSMUSG00000074506	110.567	30.9951	1.84075	0.0017646	0.0258417	Gm10705	3	87207545	87208005	-	461	processed_pseudogene	predicted gene 10705 [Source:MGI Symbol;Acc:MGI:3708678]
ENSMUSG00000095788	132.175	63.4033	1.05908	0.00178347	0.0260302	Sirpb1a	3	15371653	15426520	-	2291	protein_coding	signal-regulatory protein beta 1A [Source:MGI Symbol;Acc:MGI:2444824]
ENSMUSG00000028111	710.038	117.167	2.59918	0.00192965	0.0276675	Ctsk	3	95499256	95509362	+	1512	protein_coding	cathepsin K [Source:MGI Symbol;Acc:MGI:107823]
ENSMUSG00000028664	20.0895	1.46394	3.79105	0.00198546	1	Ephb2	4	136647539	136835988	-	12608	protein_coding	Ephrin type-B receptor 2 [Source:UniProtKB/Swiss-Prot;Acc:P54763]
ENSMUSG00000060962	32.0995	4.85574	2.72928	0.0020052	1	Dmkn	7	30763756	30781063	+	2192	protein_coding	Dermokine [Source:UniProtKB/Swiss-Prot;Acc:Q6P253]
ENSMUSG00000095197	45.2053	105.848	-1.22787	0.00201482	0.0283578	Ighv1-59	12	115335082	115335514	-	351	IG_V_gene
ENSMUSG00000046031	52.4078	115.631	-1.1419	0.00205828	0.0287519	Fam26f	10	34126067	34127984	-	1094	protein_coding	family with sequence similarity 26, member F [Source:MGI Symbol;Acc:MGI:2443082]
ENSMUSG00000005339	58.497	126.698	-1.11464	0.00219519	0.030307	Fcer1a	1	173221284	173227214	-	998	protein_coding	High affinity immunoglobulin epsilon receptor subunit alpha [Source:UniProtKB/Swiss-Prot;Acc:P20489]
ENSMUSG00000027276	403.404	189.664	1.08827	0.00223123	0.0306418	Jag1	2	137081456	137116644	-	5827	protein_coding	Protein jagged-1 [Source:UniProtKB/Swiss-Prot;Acc:Q9QXX0]
ENSMUSG00000026768	44.1426	11.4951	1.93898	0.00247751	1	Itga8	2	12106632	12301922	-	7368	protein_coding	Integrin alpha-8 Integrin alpha-8 heavy chain Integrin alpha-8 light chain [Source:UniProtKB/Swiss-Prot;Acc:A2ARA8]
ENSMUSG00000049804	128.025	53.0476	1.26964	0.00256474	0.0339679	Armcx4	X	134686519	134696757	+	7996	protein_coding	armadillo repeat containing, X-linked 4 [Source:MGI Symbol;Acc:MGI:2147887]
ENSMUSG00000057666	1310.18	433.812	1.59463	0.00295052	0.0376228	Gapdh	6	125161715	125166467	-	4133	protein_coding	Glyceraldehyde-3-phosphate dehydrogenase [Source:UniProtKB/Swiss-Prot;Acc:P16858]
ENSMUSG00000085603	124.13	253.231	-1.0295	0.00297273	0.0378318	Gm11346	13	24596347	24604925	-	4098	transcribed_processed_pseudogene	predicted gene 11346 [Source:MGI Symbol;Acc:MGI:1923274]
ENSMUSG00000110279	89.5514	198.535	-1.14988	0.00309644	0.0389493	Gm45552	7	45121917	45124144	+	778	antisense	predicted gene 45552 [Source:MGI Symbol;Acc:MGI:5791388]
ENSMUSG00000087281	62.3094	126.487	-1.02209	0.00320385	0.0398766	Gm16015	5	43909215	43909885	-	390	antisense	predicted gene 16015 [Source:MGI Symbol;Acc:MGI:3801811]
ENSMUSG00000031502	145.011	63.9345	1.17968	0.00320965	0.0399106	Col4a1	8	11198423	11312826	-	7464	protein_coding	Collagen alpha-1(IV) chain Arresten [Source:UniProtKB/Swiss-Prot;Acc:P02463]
ENSMUSG00000040380	43.5521	112.766	-1.37282	0.00322555	0.0400319	Cbln3	14	55878913	55884392	-	4866	protein_coding	Cerebellin-3 [Source:UniProtKB/Swiss-Prot;Acc:Q9JHG0]
ENSMUSG00000023046	24.239	2.31968	3.35804	0.00330003	1	Igfbp6	15	102144362	102149511	+	1112	protein_coding	Insulin-like growth factor-binding protein 6 [Source:UniProtKB/Swiss-Prot;Acc:P47880]
ENSMUSG00000067586	113.89	52.1246	1.12908	0.0033654	0.0411142	S1pr3	13	51408639	51422797	+	4463	protein_coding	Sphingosine 1-phosphate receptor 3 [Source:UniProtKB/Swiss-Prot;Acc:Q9Z0U9]
ENSMUSG00000070305	169.232	345.748	-1.02944	0.00340722	0.0414567	Mpzl3	9	45055186	45077436	+	6987	protein_coding	Myelin protein zero-like protein 3 [Source:UniProtKB/Swiss-Prot;Acc:Q3V3F6]
ENSMUSG00000109656	64.3334	128.703	-1.00034	0.00343393	0.0416648	Gm45548	7	101351273	101354439	-	3167	TEC	predicted gene 45548 [Source:MGI Symbol;Acc:MGI:5791384]
ENSMUSG00000019966	11.3182	44.8099	-1.98333	0.00346515	1	Kitl	10	100015630	100100416	+	5911	protein_coding	Kit ligand Soluble KIT ligand [Source:UniProtKB/Swiss-Prot;Acc:P20826]
ENSMUSG00000095562	57.7713	160.556	-1.47465	0.00356308	0.0426563	Gm21887	X	170009659	170019281	+	759	protein_coding
ENSMUSG00000093838	43.7211	99.528	-1.18792	0.00362392	0.0432445	Ighv3-1	12	113964388	113964818	-	350	IG_V_gene
ENSMUSG00000043931	144.338	289.31	-1.00444	0.00372123	0.0440424	Gimap7	6	48718621	48724636	+	2325	protein_coding
ENSMUSG00000050395	17.3904	57.7951	-1.73142	0.00382626	0.0447822	Tnfsf15	4	63727084	63745113	-	3347	protein_coding	tumor necrosis factor (ligand) superfamily, member 15 [Source:MGI Symbol;Acc:MGI:2180140]
ENSMUSG00000026207	73.7627	28.3099	1.37977	0.00408417	0.0467234	Speg	1	75375297	75432320	+	12741	protein_coding	SPEG complex locus [Source:MGI Symbol;Acc:MGI:109282]
ENSMUSG00000026072	150.897	65.5066	1.20296	0.00436911	0.0491204	Il1r1	1	40225080	40317257	+	6363	protein_coding	Interleukin-1 receptor type 1 Interleukin-1 receptor type 1, membrane form Interleukin-1 receptor type 1, soluble form [Source:UniProtKB/Swiss-Prot;Acc:P13504]
ENSMUSG00000018459	1517.73	102.244	3.89175	0.00444623	0.0496872	Slc13a3	2	165405028	165473230	-	5215	protein_coding	solute carrier family 13 (sodium-dependent dicarboxylate transporter), member 3 [Source:MGI Symbol;Acc:MGI:2149635]
ENSMUSG00000106682	59.9305	128.384	-1.09732	0.00446083	0.0497523	Gm42648	5	65778014	65780518	+	2505	TEC	predicted gene 42648 [Source:MGI Symbol;Acc:MGI:5662785]
ENSMUSG00000080316	98.0861	41.7328	1.23104	0.00450245	0.0500576	Spaca6	17	17827158	17843009	+	7067	protein_coding	Sperm acrosome membrane-associated protein 6 [Source:UniProtKB/Swiss-Prot;Acc:E9Q8Q8]
ENSMUSG00000055629	38.5595	10.1754	1.92568	0.00451504	1	B4galnt4	7	141061104	141072400	+	3852	protein_coding	N-acetyl-beta-glucosaminyl-glycoprotein 4-beta-N-acetylgalactosaminyltransferase 1 [Source:UniProtKB/Swiss-Prot;Acc:Q766D5]
ENSMUSG00000038236	115.813	53.0164	1.12839	0.00464584	0.0513449	Hoxa7	6	52214491	52221854	-	2876	protein_coding	homeobox A7 [Source:MGI Symbol;Acc:MGI:96179]
ENSMUSG00000029072	34.0898	84.5787	-1.31186	0.00489148	0.0529338	Tas1r3	4	155859268	155863362	-	3523	protein_coding	Taste receptor type 1 member 3 [Source:UniProtKB/Swiss-Prot;Acc:Q925D8]
ENSMUSG00000022748	135.548	67.3984	1.0062	0.00548928	0.0573527	Cmss1	16	57302199	57606825	-	930	protein_coding	Protein CMSS1 [Source:UniProtKB/Swiss-Prot;Acc:Q9CZT6]
ENSMUSG00000022074	95.0662	40.4804	1.22826	0.00556143	0.0577847	Tnfrsf10b	14	69767472	69784411	+	5451	protein_coding	Tumor necrosis factor receptor superfamily member 10B [Source:UniProtKB/Swiss-Prot;Acc:Q9QZM4]
ENSMUSG00000018509	140.861	68.2951	1.04488	0.00556841	0.0578111	Cenpv	11	62524946	62539261	-	1811	protein_coding	Centromere protein V [Source:UniProtKB/Swiss-Prot;Acc:Q9CXS4]
ENSMUSG00000003352	162.505	55.1509	1.55647	0.00558122	0.0578519	Cacnb3	15	98630840	98644529	+	4010	protein_coding	Mus musculus calcium channel, voltage-dependent, beta 3 subunit (Cacnb3), transcript variant 4, mRNA. [Source:RefSeq mRNA;Acc:NM_001356543]
ENSMUSG00000016494	2123.68	865.853	1.29434	0.00573596	0.0589921	Cd34	1	194938819	194961279	+	7290	protein_coding	Hematopoietic progenitor cell antigen CD34 [Source:UniProtKB/Swiss-Prot;Acc:Q64314]
ENSMUSG00000040957	94.9648	43.7328	1.11853	0.00577443	0.0592566	Cables1	18	11839220	11945630	+	3839	protein_coding	CDK5 and ABL1 enzyme substrate 1 [Source:UniProtKB/Swiss-Prot;Acc:Q9ESJ1]
ENSMUSG00000036111	59.4076	20.6705	1.52337	0.00597705	0.0607932	Lmo1	7	109138572	109175207	-	1552	protein_coding	Rhombotin-1 [Source:UniProtKB/Swiss-Prot;Acc:Q924W9]
ENSMUSG00000028464	34.562	80.8984	-1.22803	0.00602322	0.0611313	Tpm2	4	43514711	43523765	-	2909	protein_coding	tropomyosin 2, beta [Source:MGI Symbol;Acc:MGI:98810]
ENSMUSG00000041046	75.4835	28.4541	1.40737	0.00629133	0.0628438	Ramp3	11	6658521	6677475	+	1380	protein_coding	Receptor activity-modifying protein 3 [Source:UniProtKB/Swiss-Prot;Acc:Q9WUP1]
ENSMUSG00000022995	61.7527	24.0623	1.35956	0.00629142	0.0628438	Enah	1	181896384	182019990	-	21452	protein_coding	ENAH, actin regulator [Source:HGNC Symbol;Acc:HGNC:18271]
ENSMUSG00000076512	8.72056	37.0984	-2.08526	0.00646343	1	Igkv9-123	6	67954228	67954714	-	377	IG_V_gene
ENSMUSG00000107770	18.9592	56.2689	-1.56643	0.00656113	0.0647116	Gm44126	6	76284416	76284929	+	514	processed_pseudogene	predicted gene, 44126 [Source:MGI Symbol;Acc:MGI:5690518]
ENSMUSG00000094117	81.6064	181.907	-1.1585	0.00665816	0.065345	Igkv3-12	6	70518250	70518849	+	359	IG_V_gene
ENSMUSG00000016283	25.2172	82.4509	-1.71134	0.00679638	0.0662787	H2-M2	17	37480851	37483552	-	1551	protein_coding	Mus musculus histocompatibility 2, M region locus 2 (H2-M2), transcript variant 2, mRNA. [Source:RefSeq mRNA;Acc:NM_001347387]
ENSMUSG00000107061	42.709	92.8984	-1.12025	0.00683521	0.0665079	Gm19590	5	75833035	75835645	-	1195	lincRNA	predicted gene, 19590 [Source:MGI Symbol;Acc:MGI:5011775]
ENSMUSG00000023045	103.905	51.3722	1.01526	0.00691329	0.0670338	Soat2	15	102150526	102163469	+	2213	protein_coding	Sterol O-acyltransferase 2 [Source:UniProtKB/Swiss-Prot;Acc:O88908]
ENSMUSG00000086860	27.4778	4.24755	2.68119	0.00704872	1	Gm1720	X	166662025	166689812	+	1503	lincRNA	predicted gene 1720 [Source:MGI Symbol;Acc:MGI:2686566]
ENSMUSG00000021765	51.8511	17.4951	1.57203	0.00707723	0.0680491	Fst	13	114452262	114458949	-	3374	protein_coding	follistatin FST315 [Source:RefSeq peptide;Acc:NP_001288302]
ENSMUSG00000111147	44.244	13.3148	1.72674	0.0071589	1	AC160562.1	9	61032212	61059116	+	3468	lincRNA
ENSMUSG00000060143	322.024	156.143	1.04292	0.00720275	0.0687987	Gm10076	14	105681828	105682211	+	384	lincRNA	predicted gene 10076 [Source:MGI Symbol;Acc:MGI:3704451]
ENSMUSG00000036040	28.152	5.74755	2.29028	0.00724826	1	Adamtsl2	2	27079379	27108981	+	7993	protein_coding	ADAMTS-like protein 2 [Source:UniProtKB/Swiss-Prot;Acc:Q7TSK7]
ENSMUSG00000000627	60.3191	125.713	-1.05886	0.00754174	0.0710463	Sema4f	6	82911885	82939769	-	5290	protein_coding	Semaphorin-4F [Source:UniProtKB/Swiss-Prot;Acc:Q9Z123]
ENSMUSG00000028780	19.8361	1.39181	3.80627	0.00766599	1	Sema3c	5	17574281	17730268	+	7140	protein_coding	Semaphorin-3C [Source:UniProtKB/Swiss-Prot;Acc:Q62181]
ENSMUSG00000046186	36.5861	9.74755	1.91414	0.00774034	1	Cd109	9	78615546	78716253	+	6900	protein_coding	CD109 antigen [Source:UniProtKB/Swiss-Prot;Acc:Q8R422]
ENSMUSG00000054203	98.1522	198.561	-1.01559	0.00803581	0.0745517	Ifi205	1	174011998	174031810	-	4177	protein_coding	Interferon-activable protein 205-A [Source:UniProtKB/Swiss-Prot;Acc:Q8CGE8]
ENSMUSG00000070942	234.594	112.771	1.05618	0.00835759	0.076705	Il1rl2	1	40324610	40367562	+	6812	protein_coding	Mus musculus interleukin 1 receptor-like 2 (Il1rl2), transcript variant 2, mRNA. [Source:RefSeq mRNA;Acc:NM_001356478]
ENSMUSG00000033644	108.661	51.8	1.06833	0.00843291	0.0770607	Piwil2	14	70372477	70429383	-	5287	protein_coding	Piwi-like protein 2 [Source:UniProtKB/Swiss-Prot;Acc:Q8CDG1]
ENSMUSG00000052485	76.0901	32.5262	1.22944	0.00860421	0.0781159	Tmem171	13	98686235	98694834	-	1583	protein_coding	Transmembrane protein 171 [Source:UniProtKB/Swiss-Prot;Acc:Q4KL18]
ENSMUSG00000038295	31.3063	7.78361	2.01421	0.00861378	1	Atg9b	5	24384181	24392143	-	3946	protein_coding	Autophagy-related protein 9B [Source:UniProtKB/Swiss-Prot;Acc:Q6EBV9]
ENSMUSG00000039911	48.9502	15.6705	1.63715	0.00863355	0.0782731	Spsb1	4	149896283	149955043	-	4396	protein_coding	SPRY domain-containing SOCS box protein 1 [Source:UniProtKB/Swiss-Prot;Acc:Q9D5L7]
ENSMUSG00000028909	85.1478	36.2328	1.22992	0.00871552	0.078551	Ptpru	4	131768457	131838288	-	7113	protein_coding	protein tyrosine phosphatase, receptor type, U [Source:MGI Symbol;Acc:MGI:1321151]
ENSMUSG00000054905	108.848	48.5476	1.16117	0.00878195	0.0788481	Stfa3	16	36450537	36455392	-	412	protein_coding	stefin A3 [Source:MGI Symbol;Acc:MGI:106196]
ENSMUSG00000033544	4.62174	24.3459	-2.39767	0.00886224	1	Angptl1	1	156838562	156861078	+	2841	protein_coding	Angiopoietin-related protein 1 [Source:UniProtKB/Swiss-Prot;Acc:Q640P2]
ENSMUSG00000053977	57.2668	12.9951	2.13867	0.00907752	0.0807242	Cd8a	6	71373427	71379173	+	3637	protein_coding	T-cell surface glycoprotein CD8 alpha chain [Source:UniProtKB/Swiss-Prot;Acc:P01731]
ENSMUSG00000039760	25.251	5.28361	2.25512	0.00908458	1	Il22ra2	10	19621998	19634681	+	2498	protein_coding	Interleukin-22 receptor subunit alpha-2 [Source:UniProtKB/Swiss-Prot;Acc:Q80XF5]
ENSMUSG00000106567	42.8442	92.6099	-1.11299	0.00915718	0.0811907	2010309G21Rik	16	19051367	19106749	+	458	antisense	RIKEN cDNA 2010309G21 gene [Source:MGI Symbol;Acc:MGI:1917268]
ENSMUSG00000039315	52.1713	17.2787	1.59411	0.0093841	0.0824188	Clnk	5	38706462	38876812	-	1719	protein_coding	Cytokine-dependent hematopoietic cell linker [Source:UniProtKB/Swiss-Prot;Acc:Q9QZE2]
ENSMUSG00000026921	88.7575	41.4853	1.09862	0.00942081	0.0825359	Egfl7	2	26580014	26593120	+	3581	protein_coding	EGF like domain multiple 7 [Source:HGNC Symbol;Acc:HGNC:20594]
ENSMUSG00000090877	83.0054	31.2689	1.40433	0.00971141	0.0845704	Hspa1b	17	34956436	34959238	-	2803	protein_coding	Heat shock 70 kDa protein 1B [Source:UniProtKB/Swiss-Prot;Acc:P17879]
ENSMUSG00000021594	64.1476	26.4902	1.27672	0.00972642	0.0846446	Srd5a1	13	69573449	69611442	-	2909	protein_coding	steroid 5 alpha-reductase 1 [Source:HGNC Symbol;Acc:HGNC:11284]
ENSMUSG00000035934	77.9967	32.5935	1.25662	0.00980011	0.0850584	Pknox2	9	36890982	37147407	-	10335	protein_coding	Homeobox protein PKNOX2 [Source:UniProtKB/Swiss-Prot;Acc:Q8BG99]
ENSMUSG00000032717	90.5788	38.2689	1.24191	0.00982988	0.08526	Mdfi	17	47815328	47834691	-	3092	protein_coding	MyoD family inhibitor [Source:UniProtKB/Swiss-Prot;Acc:P70331]
ENSMUSG00000027978	57.9072	122.853	-1.08591	0.00985403	0.0853445	Prss12	3	123446913	123506597	+	2602	protein_coding	protease, serine 12 neurotrypsin (motopsin) [Source:MGI Symbol;Acc:MGI:1100881]
ENSMUSG00000029581	219.281	96.3378	1.18373	0.0098593	0.0853445	Fscn1	5	142960343	142973185	+	3012	protein_coding	Fascin [Source:UniProtKB/Swiss-Prot;Acc:Q61553]
ENSMUSG00000073242	3.03611	24.959	-3.02766	0.00989461	1	Dnmt3aos	12	3859293	3862244	-	1385	antisense
ENSMUSG00000110195	21.7089	58.4443	-1.43021	0.0099306	0.0857906	Pde2a	7	101421691	101512827	+	6149	protein_coding	phosphodiesterase 2A, cGMP-stimulated [Source:MGI Symbol;Acc:MGI:2446107]
ENSMUSG00000045045	52.6943	17.7066	1.57201	0.0100916	0.0866069	Lrfn4	19	4611785	4615667	-	3366	protein_coding	Leucine-rich repeat and fibronectin type-III domain-containing protein 4 [Source:UniProtKB/Swiss-Prot;Acc:Q80XU8]
ENSMUSG00000032714	45.3236	93.8886	-1.05216	0.0101294	0.0868169	Syde1	10	78584503	78591964	-	3288	protein_coding	synapse defective 1, Rho GTPase, homolog 1 (C. elegans) [Source:MGI Symbol;Acc:MGI:1918959]
ENSMUSG00000036186	55.7642	19.7787	1.49723	0.0106986	0.0902622	Fam69b	2	26628457	26636497	+	2476	protein_coding	Protein FAM69B [Source:UniProtKB/Swiss-Prot;Acc:Q99ML4]
ENSMUSG00000059775	83.0906	189.181	-1.18886	0.0107514	0.0905389	Rps26-ps1	8	107439131	107439579	-	449	transcribed_processed_pseudogene	ribosomal protein S26, pseudogene 1 [Source:MGI Symbol;Acc:MGI:3704322]
ENSMUSG00000081957	17.3736	1.96394	3.16097	0.0107887	1	Ak3l2-ps	2	72633936	72634607	+	672	processed_pseudogene	adenylate kinase 3-like 2, pseudogene [Source:MGI Symbol;Acc:MGI:3574349]
ENSMUSG00000041361	58.328	121.208	-1.05322	0.011267	0.093669	Myzap	9	71504347	71592360	-	5635	protein_coding	Myocardial zonula adherens protein [Source:UniProtKB/Swiss-Prot;Acc:Q3UIJ9]
ENSMUSG00000039062	734.211	1715.92	-1.22459	0.0112975	0.0937365	Anpep	7	79821803	79861059	-	4135	protein_coding	Aminopeptidase N [Source:UniProtKB/Swiss-Prot;Acc:P97449]
ENSMUSG00000094124	39.7405	86.5427	-1.12324	0.0115036	0.0948877	Ighv1-74	12	115802648	115803080	-	351	IG_V_gene
ENSMUSG00000019852	105.507	46.6558	1.17483	0.0115068	0.0948877	Arfgef3	10	18581839	18743949	-	14579	protein_coding	Brefeldin A-inhibited guanine nucleotide-exchange protein 3 [Source:UniProtKB/Swiss-Prot;Acc:Q3UGY8]
ENSMUSG00000049409	123.995	61.4755	1.01089	0.0119378	0.09738	Prokr1	6	87578591	87590743	-	4230	protein_coding	Mus musculus prokineticin receptor 1 (Prokr1), transcript variant 2, mRNA. [Source:RefSeq mRNA;Acc:NM_001355655]
ENSMUSG00000004105	59.9981	24.1705	1.31404	0.0121784	0.0987893	Angptl2	2	33216069	33247717	+	6286	protein_coding	Angiopoietin-related protein 2 [Source:UniProtKB/Swiss-Prot;Acc:Q9R045]
ENSMUSG00000022838	55.8148	116.857	-1.06368	0.012408	0.0996705	Eaf2	16	36792884	36875003	-	4370	protein_coding	ELL-associated factor 2 [Source:UniProtKB/Swiss-Prot;Acc:Q91ZD6]
ENSMUSG00000073988	115.813	57.4394	1.0107	0.0124539	0.0998231	Ttpa	4	20007938	20030785	+	3488	protein_coding	tocopherol (alpha) transfer protein [Source:MGI Symbol;Acc:MGI:1354168]
ENSMUSG00000105432	8.21454	30.4541	-1.88852	0.0128829	1	Gm43218	6	70240427	70240972	-	344	IG_V_gene
ENSMUSG00000022900	12.8363	39.0574	-1.60412	0.0129444	1	Ildr1	16	36693978	36726804	+	4296	protein_coding	Immunoglobulin-like domain-containing receptor 1 [Source:UniProtKB/Swiss-Prot;Acc:Q8CBR1]
ENSMUSG00000100615	17.5256	47.8771	-1.44993	0.0130197	0.102854	Gm5511	19	11438031	11438832	+	802	processed_pseudogene	predicted gene 5511 [Source:MGI Symbol;Acc:MGI:3779492]
ENSMUSG00000062661	69.7138	29.6656	1.23115	0.0132777	0.104051	Ncs1	2	31245823	31295989	+	4653	protein_coding	Neuronal calcium sensor 1 [Source:UniProtKB/Swiss-Prot;Acc:Q8BNY6]
ENSMUSG00000075269	79.6315	25.9853	1.61177	0.0133465	0.104297	Bex6	16	32186186	32186949	+	764	protein_coding	Protein BEX6 [Source:UniProtKB/Swiss-Prot;Acc:Q3TZW7]
ENSMUSG00000018821	48.9839	18.2066	1.42535	0.0134021	0.104605	Avpi1	19	42123273	42129059	-	1236	protein_coding	Arginine vasopressin-induced protein 1 [Source:UniProtKB/Swiss-Prot;Acc:Q9D7H4]
ENSMUSG00000042807	22.0966	55.1246	-1.31751	0.0134612	0.104941	Hecw2	1	53806876	54195168	-	12947	protein_coding	E3 ubiquitin-protein ligase HECW2 [Source:UniProtKB/Swiss-Prot;Acc:Q6I6G8]
ENSMUSG00000026121	90.5296	39.4492	1.19738	0.0134748	0.104984	Sema4c	1	36548639	36558349	-	4593	protein_coding	Semaphorin-4C [Source:UniProtKB/Swiss-Prot;Acc:Q64151]
ENSMUSG00000045790	39.9255	12.459	1.67906	0.0134791	1	Ccdc149	5	52374651	52471521	-	3328	protein_coding	coiled-coil domain containing 149 [Source:MGI Symbol;Acc:MGI:2685293]
ENSMUSG00000094194	560.93	1348.17	-1.26499	0.0135181	0.105132	Ighv5-16	12	113838526	113839010	-	380	IG_V_gene
ENSMUSG00000072601	21.0001	53.9804	-1.35997	0.0143545	0.109479	Ear1	14	43818765	43875517	-	730	protein_coding	Eosinophil cationic protein 1 [Source:UniProtKB/Swiss-Prot;Acc:P97426]
ENSMUSG00000028758	95.0662	47.5213	1.00307	0.0150014	0.112827	Kif17	4	138250435	138301967	+	4582	protein_coding	Kinesin-like protein KIF17 [Source:UniProtKB/Swiss-Prot;Acc:Q99PW8]
ENSMUSG00000115919	49.5061	113.785	-1.19813	0.0160085	0.118309	AC169509.3	16	24085083	24090089	-	3556	lincRNA
ENSMUSG00000109807	8.18076	33.1246	-2.01729	0.0165561	1	Gm45244	8	46471391	46473590	-	2200	TEC	predicted gene 45244 [Source:MGI Symbol;Acc:MGI:5791080]
ENSMUSG00000096649	8.299	31.9853	-1.9518	0.0168837	1	Ighv1-31	12	114829264	114829697	-	351	IG_V_gene
ENSMUSG00000094491	14.3543	41.1968	-1.52044	0.0169882	1	Igkv1-133	6	67724902	67725661	+	374	IG_V_gene
ENSMUSG00000094134	11.8749	36.4853	-1.6218	0.0171454	1	Ighv5-15	12	113826646	113827129	-	361	IG_V_gene
ENSMUSG00000076548	30.3619	66.1869	-1.12526	0.0174905	0.125391	Igkv4-69	6	69283794	69284319	-	348	IG_V_gene
ENSMUSG00000076562	44.8176	96.0591	-1.10213	0.0178276	0.126957	Igkv4-50	6	69700767	69701287	-	352	IG_V_gene
ENSMUSG00000076670	5.09397	29.6754	-2.53535	0.0184653	1	Ighv3-5	12	114262652	114263087	-	353	IG_V_gene
ENSMUSG00000092748	45.7951	119.497	-1.38131	0.0186687	0.131164	Gm22175	12	113425150	113425227	-	78	miRNA	predicted gene, 22175 [Source:MGI Symbol;Acc:MGI:5451952]
ENSMUSG00000008845	46.7403	17.6344	1.40243	0.0188789	0.132214	Cd163	6	124304656	124330527	+	5461	protein_coding	Scavenger receptor cysteine-rich type 1 protein M130 Soluble CD163 [Source:UniProtKB/Swiss-Prot;Acc:Q2VLH6]
ENSMUSG00000056055	15.4677	41.9131	-1.4391	0.0189413	1	Sag	1	87803680	87845158	+	8904	protein_coding	S-antigen, retina and pineal gland (arrestin) [Source:MGI Symbol;Acc:MGI:98227]
ENSMUSG00000096960	23.5302	5.24755	2.16093	0.0193816	1	A230028O05Rik	16	25059639	25069058	+	2793	lincRNA	RIKEN cDNA A230028O05 gene [Source:MGI Symbol;Acc:MGI:2442126]
ENSMUSG00000038067	35.0174	11.459	1.60751	0.0194442	1	Csf3	11	98701263	98703629	+	1413	protein_coding	Granulocyte colony-stimulating factor [Source:UniProtKB/Swiss-Prot;Acc:P09920]
ENSMUSG00000031142	28.3716	6.89181	2.05175	0.0196143	1	Cacna1f	X	7607083	7635196	+	9089	protein_coding	calcium voltage-gated channel subunit alpha1 F [Source:HGNC Symbol;Acc:HGNC:1393]
ENSMUSG00000105727	14.8772	41.0935	-1.46369	0.019792	1	Gm8828	6	70209552	70213767	-	1290	processed_pseudogene	predicted gene 8828 [Source:MGI Symbol;Acc:MGI:3643936]
ENSMUSG00000041193	7.28697	0	5.3605	0.020181	1	Pla2g5	4	138799244	138863482	-	2884	protein_coding	phospholipase A2, group V [Source:MGI Symbol;Acc:MGI:101899]
ENSMUSG00000021640	13.3085	39.2328	-1.55862	0.0202662	1	Naip1	13	100407764	100452869	-	5536	protein_coding	NLR family, apoptosis inhibitory protein 1 [Source:MGI Symbol;Acc:MGI:1298223]
ENSMUSG00000060275	78.0965	31.0262	1.33465	0.0204702	0.139238	Nrg2	18	36017707	36197380	-	3081	protein_coding	neuregulin 2 [Source:HGNC Symbol;Acc:HGNC:7998]
ENSMUSG00000061724	29.3329	63.1558	-1.10626	0.0207925	0.140476	Gm2423	13	13232161	13232893	-	733	processed_pseudogene	predicted gene 2423 [Source:MGI Symbol;Acc:MGI:3805957]
ENSMUSG00000021396	1.51806	14.5312	-3.24523	0.0208527	1	Nxnl2	13	51171022	51175188	+	3505	protein_coding	Nucleoredoxin-like protein 2 [Source:UniProtKB/Swiss-Prot;Acc:Q9D531]
ENSMUSG00000028773	13.9328	39.1656	-1.49173	0.021588	1	Fabp3	4	130308595	130315463	+	823	protein_coding	Fatty acid-binding protein, heart [Source:UniProtKB/Swiss-Prot;Acc:P11404]
ENSMUSG00000096498	29.9403	65.4394	-1.12956	0.0216672	0.143921	Ighv2-5	12	113685482	113686045	-	480	IG_V_gene
ENSMUSG00000076674	59.6941	128.235	-1.10161	0.0217508	0.144329	Ighv3-8	12	114322327	114322801	-	394	IG_V_gene
ENSMUSG00000087362	11.858	35.3459	-1.57566	0.0217985	1	Gm13710	2	84500760	84531322	-	965	lincRNA	predicted gene 13710 [Source:MGI Symbol;Acc:MGI:3650894]
ENSMUSG00000094018	0	6.85574	-5.17675	0.0223196	1	S100a2	3	90590247	90591508	+	315	protein_coding
ENSMUSG00000026211	27.8149	60.5476	-1.12318	0.0224141	0.146712	Obsl1	1	75479310	75506452	-	8467	protein_coding	Obscurin-like protein 1 [Source:UniProtKB/Swiss-Prot;Acc:D3YYU8]
ENSMUSG00000070880	28.8945	65.5164	-1.18076	0.0224945	0.146942	Gad1	2	70553072	70602014	+	7639	protein_coding	glutamate decarboxylase 1 [Source:MGI Symbol;Acc:MGI:95632]
ENSMUSG00000023972	73.0195	28.0213	1.37912	0.0236715	0.152188	Ptk7	17	46564451	46629504	-	4255	protein_coding	Inactive tyrosine-protein kinase 7 [Source:UniProtKB/Swiss-Prot;Acc:Q8BKG3]
ENSMUSG00000028019	6.6627	25.8148	-1.95002	0.0242735	1	Pdgfc	3	81036416	81214040	+	5089	protein_coding	platelet-derived growth factor, C polypeptide [Source:MGI Symbol;Acc:MGI:1859631]
ENSMUSG00000044471	26.6677	58.8361	-1.14001	0.025319	0.159549	Lncpint	6	31082565	31220488	-	7378	lincRNA
ENSMUSG00000063455	67.9762	28.7377	1.24158	0.0254448	0.160187	D630045J12Rik	6	38123174	38254009	-	13450	protein_coding	UPF0606 protein KIAA1549 [Source:UniProtKB/Swiss-Prot;Acc:Q68FD9]
ENSMUSG00000006369	9.74949	0.5	4.33108	0.0259632	1	Fbln1	15	85205949	85286535	+	4368	protein_coding	Mus musculus fibulin 1 (Fbln1), transcript variant 2, mRNA. [Source:RefSeq mRNA;Acc:NM_001347088]
ENSMUSG00000111685	45.4587	16.6344	1.44485	0.0265028	1	Gm10686	9	44255047	44258293	+	3247	TEC
ENSMUSG00000111171	13.3592	1.92787	2.79398	0.0267857	1	Gm47815	10	43034993	43050219	+	1686	antisense	predicted gene, 47815 [Source:MGI Symbol;Acc:MGI:6097001]
ENSMUSG00000024912	59.0536	27.3099	1.11119	0.0270499	0.166981	Fosl1	19	5447703	5455945	+	1707	protein_coding	Fos-related antigen 1 [Source:UniProtKB/Swiss-Prot;Acc:P48755]
ENSMUSG00000105231	14.9448	39.0213	-1.38534	0.0271821	1	Iglj3	16	19067041	19067078	-	38	IG_J_gene
ENSMUSG00000111862	34.7471	76.0427	-1.12784	0.0274831	0.168485	Gm47828	9	51215733	51219521	+	1248	sense_intronic	predicted gene, 47828 [Source:MGI Symbol;Acc:MGI:6097024]
ENSMUSG00000029379	930.193	195.063	2.2533	0.0275265	0.168485	Cxcl3	5	90786103	90789600	+	3498	protein_coding	C-X-C motif chemokine 3 [Source:UniProtKB/Swiss-Prot;Acc:Q6W5C0]
ENSMUSG00000060512	52.8801	23.4902	1.16947	0.0280145	0.169954	0610040J01Rik	5	63812363	63899625	+	2403	protein_coding	RIKEN cDNA 0610040J01 gene [Source:MGI Symbol;Acc:MGI:1923511]
ENSMUSG00000093327	23.7329	53.4443	-1.17237	0.0282659	0.170921	Mir5107	18	60812076	60812163	+	88	miRNA	microRNA 5107 [Source:MGI Symbol;Acc:MGI:4950427]
ENSMUSG00000007989	65.1934	31.8459	1.03501	0.0290752	0.173717	Fzd3	14	65192449	65262463	-	12804	protein_coding	Frizzled-3 [Source:UniProtKB/Swiss-Prot;Acc:Q61086]
ENSMUSG00000103591	24.0363	57.1607	-1.24665	0.0291186	0.173889	Gm38365	1	87897540	87900532	+	2993	TEC	predicted gene, 38365 [Source:MGI Symbol;Acc:MGI:5611593]
ENSMUSG00000050052	12.5161	0.963935	3.69802	0.0292769	1	Tdrp	8	13952008	13975032	-	4695	protein_coding	testis development related protein [Source:MGI Symbol;Acc:MGI:1919398]
ENSMUSG00000108699	0	6.39181	-5.07522	0.0297835	1	Gm18988	7	66126954	66127699	-	746	processed_pseudogene	predicted gene, 18988 [Source:MGI Symbol;Acc:MGI:5011173]
ENSMUSG00000030068	3.54213	20.7066	-2.5386	0.0302456	1	Gm20696	6	99257484	99666797	-	4075	protein_coding
ENSMUSG00000050914	54.6515	23.8459	1.19262	0.0302646	0.178935	Ankrd37	8	45996902	46005707	-	1539	protein_coding	Ankyrin repeat domain-containing protein 37 [Source:UniProtKB/Swiss-Prot;Acc:Q569N2]
ENSMUSG00000085996	28.6411	63.4394	-1.14554	0.0303602	0.179419	A830012C17Rik	4	4138321	4188703	+	1665	processed_transcript	RIKEN cDNA A830012C17 gene [Source:MGI Symbol;Acc:MGI:2441830]
ENSMUSG00000096461	11.3351	36.8148	-1.69739	0.0306551	1	Igkv14-130	6	67791046	67791511	+	353	IG_V_gene
ENSMUSG00000053702	46.2849	19.423	1.25639	0.0307981	0.18102	Nebl	2	17343909	17731464	-	15235	protein_coding	LIM zinc-binding domain-containing Nebulette [Source:UniProtKB/Swiss-Prot;Acc:Q9DC07]
ENSMUSG00000105804	21.9615	54.7689	-1.31484	0.0310118	0.181945	Gm43654	3	127829555	127832971	-	3417	TEC	predicted gene 43654 [Source:MGI Symbol;Acc:MGI:5663791]
ENSMUSG00000004113	19.5159	45.6607	-1.22595	0.0310535	0.181945	Cacna1b	2	24603887	24763152	-	9942	protein_coding	Voltage-dependent N-type calcium channel subunit alpha-1B [Source:UniProtKB/Swiss-Prot;Acc:O55017]
ENSMUSG00000024043	58.2105	25.1656	1.20488	0.0313695	0.18285	Arhgap28	17	67842713	68004120	-	5377	protein_coding	Mus musculus Rho GTPase activating protein 28 (Arhgap28), transcript variant 2, mRNA. [Source:RefSeq mRNA;Acc:NM_001347410]
ENSMUSG00000097532	6.24114	0	5.13703	0.0315557	1	Gm4349	3	95427671	95431087	+	2559	lincRNA	predicted gene 4349 [Source:MGI Symbol;Acc:MGI:3782533]
ENSMUSG00000016529	70.3219	30.4131	1.20488	0.032486	0.187471	Il10	1	131019845	131024974	+	1310	protein_coding	Interleukin-10 [Source:UniProtKB/Swiss-Prot;Acc:P18893]
ENSMUSG00000108752	21.9108	56.9804	-1.37545	0.0330637	0.190299	Gm45191	7	122313064	122318502	+	5439	TEC	predicted gene 45191 [Source:MGI Symbol;Acc:MGI:5753767]
ENSMUSG00000094504	25.1834	7.74755	1.70391	0.0342471	1	Gm5294	5	138820080	138821619	+	651	protein_coding
ENSMUSG00000047643	5.66756	0	4.99913	0.0343382	1	Gm5454	13	103356252	103357704	+	1453	processed_pseudogene	predicted gene 5454 [Source:MGI Symbol;Acc:MGI:3648286]
ENSMUSG00000102114	5.66756	0	4.99913	0.0343382	1	BC048559	10	41746721	41783437	+	3784	antisense	cDNA sequence BC048559 [Source:MGI Symbol;Acc:MGI:3814724]
ENSMUSG00000024186	30.3619	10.6394	1.51501	0.0343996	1	Rgs11	17	26202951	26211324	+	4206	protein_coding	regulator of G-protein signaling 11 [Source:MGI Symbol;Acc:MGI:1354739]
ENSMUSG00000052305	222.363	1477.27	-2.73184	0.0349553	0.19625	Hbb-bs	7	103826534	103828096	-	768	protein_coding	Mus musculus hemoglobin, beta adult major chain (Hbb-b1), mRNA. [Source:RefSeq mRNA;Acc:NM_001278161]
ENSMUSG00000029797	12.8194	34.5213	-1.42853	0.03516	1	Sspo	6	48448229	48501250	+	15863	protein_coding	SCO-spondin [Source:UniProtKB/Swiss-Prot;Acc:Q8CG65]
ENSMUSG00000020131	38.0704	14.7787	1.36101	0.0352218	1	Pcsk4	10	80321283	80329498	-	2958	protein_coding	Proprotein convertase subtilisin/kexin type 4 [Source:UniProtKB/Swiss-Prot;Acc:P29121]
ENSMUSG00000032356	24.8125	7.21148	1.78115	0.0353227	1	Rasgrf1	9	89909908	90026977	+	11063	protein_coding	RAS protein-specific guanine nucleotide-releasing factor 1 [Source:MGI Symbol;Acc:MGI:99694]
ENSMUSG00000009356	28.1858	8.78361	1.68904	0.0358662	1	Lpo	11	87806428	87828289	-	3135	protein_coding	lactoperoxidase [Source:MGI Symbol;Acc:MGI:1923363]
ENSMUSG00000086612	0	5.74755	-4.92533	0.0360746	1	Gm12064	11	24099688	24115405	-	533	antisense	predicted gene 12064 [Source:MGI Symbol;Acc:MGI:3649477]
ENSMUSG00000087484	36.2652	76.9705	-1.08371	0.0362293	0.201248	2900089D17Rik	5	144241690	144256186	-	2583	antisense	RIKEN cDNA 2900089D17 gene [Source:MGI Symbol;Acc:MGI:1914527]
ENSMUSG00000034460	24.0025	6.17542	1.95357	0.036311	1	Six4	12	73099609	73113456	-	10855	protein_coding	Homeobox protein SIX4 [Source:UniProtKB/Swiss-Prot;Acc:Q61321]
ENSMUSG00000099902	9.80017	28.8099	-1.5576	0.0368354	1	Gm12115	11	33172919	33173365	+	447	processed_pseudogene	predicted gene 12115 [Source:MGI Symbol;Acc:MGI:3652288]
ENSMUSG00000096670	19.9543	47.9492	-1.26163	0.0368779	0.203783	Ighv2-6	12	113716670	113717103	-	350	IG_V_gene
ENSMUSG00000090231	23.564	56.0427	-1.25065	0.0375731	0.206835	Cfb	17	34856374	34862518	-	2825	protein_coding	Complement factor B Complement factor B Ba fragment Complement factor B Bb fragment [Source:UniProtKB/Swiss-Prot;Acc:P04186]
ENSMUSG00000095682	17.5256	45.4541	-1.37332	0.0380809	1	Igkv3-1	6	70703578	70704177	+	359	IG_V_gene
ENSMUSG00000113749	42.7935	18.2787	1.22644	0.0381761	1	Mrto4-ps1	12	20417722	20418442	+	721	processed_pseudogene	mRNA turnover 4, pseudogene 1 [Source:MGI Symbol;Acc:MGI:3644169]
ENSMUSG00000102856	25.5374	58.2279	-1.18674	0.0387171	0.210983	Gm37084	1	131086252	131092149	-	5898	TEC	predicted gene, 37084 [Source:MGI Symbol;Acc:MGI:5610312]
ENSMUSG00000103443	1.55184	11.6754	-2.9139	0.0390729	1	Gm37132	1	195079099	195081336	-	2238	TEC	predicted gene, 37132 [Source:MGI Symbol;Acc:MGI:5610360]
ENSMUSG00000102880	2.54699	14.459	-2.49846	0.0396029	1	4930517J16Rik	4	44669330	44670897	+	1568	TEC	RIKEN cDNA 4930517J16 gene [Source:MGI Symbol;Acc:MGI:1921972]
ENSMUSG00000048015	2.07475	13.0672	-2.65991	0.0396042	1	Neurod4	10	130268152	130280240	-	3345	protein_coding	neurogenic differentiation 4 [Source:MGI Symbol;Acc:MGI:108055]
ENSMUSG00000002059	46.8585	20.8508	1.17091	0.0397256	0.214344	Rab34	11	78188430	78192193	+	2385	protein_coding	RAB34, member RAS oncogene family [Source:HGNC Symbol;Acc:HGNC:16519]
ENSMUSG00000028289	47.2801	21.6705	1.12592	0.0397885	0.214585	Epha7	4	28813131	28967499	+	9884	protein_coding	Ephrin type-A receptor 7 [Source:UniProtKB/Swiss-Prot;Acc:Q61772]
ENSMUSG00000033717	25.251	52.9804	-1.06976	0.040059	0.215346	Adra2a	19	54045182	54048982	+	3801	protein_coding	adrenoceptor alpha 2A [Source:HGNC Symbol;Acc:HGNC:281]
ENSMUSG00000020092	26.2968	8.63935	1.60399	0.0402145	1	Pald1	10	61319656	61383530	-	4535	protein_coding	phosphatase domain containing, paladin 1 [Source:HGNC Symbol;Acc:HGNC:23530]
ENSMUSG00000006378	18.9592	4.81968	1.97744	0.0406045	1	Gcat	15	79030874	79038353	+	2384	protein_coding	2-amino-3-ketobutyrate coenzyme A ligase, mitochondrial [Source:UniProtKB/Swiss-Prot;Acc:O88986]
ENSMUSG00000103382	25.2003	52.4443	-1.05739	0.0407852	0.21765	Gm37755	1	66812315	66814493	+	2179	TEC	predicted gene, 37755 [Source:MGI Symbol;Acc:MGI:5610983]
ENSMUSG00000070873	7.65785	25.8099	-1.75055	0.0407952	1	Lilra5	7	4237754	4243463	+	2109	protein_coding
ENSMUSG00000111875	57.8396	22.6295	1.34754	0.0408186	0.21765	Gm5425	10	84308886	84309344	+	459	processed_pseudogene	predicted gene 5425 [Source:MGI Symbol;Acc:MGI:3643901]
ENSMUSG00000020099	49.3379	19.8459	1.30786	0.041311	0.218718	Unc5b	10	60762593	60831581	-	6258	protein_coding	unc-5 netrin receptor B [Source:MGI Symbol;Acc:MGI:894703]
ENSMUSG00000000440	44.5142	92.5115	-1.05552	0.0434054	0.225227	Pparg	6	115360951	115490399	+	2953	protein_coding	peroxisome proliferator activated receptor gamma [Source:MGI Symbol;Acc:MGI:97747]
ENSMUSG00000070436	12.9038	33.9492	-1.39848	0.0434759	1	Serpinh1	7	99345376	99353239	-	2443	protein_coding	Serpin H1 [Source:UniProtKB/Swiss-Prot;Acc:P19324]
ENSMUSG00000044726	11.8411	1.5	3.00701	0.0435025	1	Erich5	15	34453305	34473892	+	2383	protein_coding	Glutamate-rich protein 5 [Source:UniProtKB/Swiss-Prot;Acc:Q8K0S2]
ENSMUSG00000102153	8.14698	27.5623	-1.75314	0.0437193	1	Gm37474	9	32525145	32526958	-	1814	TEC	predicted gene, 37474 [Source:MGI Symbol;Acc:MGI:5610702]
ENSMUSG00000095863	8.68678	26.882	-1.62711	0.044166	1	Ighv1-67	12	115603940	115604376	-	351	IG_V_gene
ENSMUSG00000002289	62.4269	29.8099	1.067	0.0442554	0.227982	Angptl4	17	33773750	33781575	-	3286	protein_coding	Angiopoietin-related protein 4 [Source:UniProtKB/Swiss-Prot;Acc:Q9Z1P8]
ENSMUSG00000092683	20.3252	56.9082	-1.48197	0.0445288	0.228789	Gm25747	12	113424645	113424722	-	78	miRNA	predicted gene, 25747 [Source:MGI Symbol;Acc:MGI:5455524]
ENSMUSG00000032360	14.9617	36.6656	-1.29403	0.0451408	1	Hcrtr2	9	76225880	76323856	-	6162	protein_coding	Orexin receptor type 2 [Source:UniProtKB/Swiss-Prot;Acc:P58308]
ENSMUSG00000032584	15.5015	3.35574	2.20441	0.0456272	1	Mst1r	9	107906873	107920383	+	5007	protein_coding	macrophage stimulating 1 receptor (c-met-related tyrosine kinase) [Source:MGI Symbol;Acc:MGI:99614]
ENSMUSG00000087129	11.7736	31.7017	-1.42723	0.0461196	1	Gm16316	2	163685004	163692279	-	3393	antisense	predicted gene 16316 [Source:MGI Symbol;Acc:MGI:3826530]
ENSMUSG00000086893	0	5.28361	-4.80351	0.0462926	1	Gm11365	13	29940283	29942261	+	774	antisense	predicted gene 11365 [Source:MGI Symbol;Acc:MGI:3652070]
ENSMUSG00000109291	0	5.28361	-4.80351	0.0462926	1	Gm2814	8	10898169	10900558	-	1277	lincRNA	predicted gene 2814 [Source:MGI Symbol;Acc:MGI:3780984]
ENSMUSG00000090145	59.6941	24.2738	1.29625	0.0463846	0.234791	Ugt1a6b	1	88103252	88219003	+	2382	protein_coding	UDP glucuronosyltransferase 1 family, polypeptide A6B [Source:MGI Symbol;Acc:MGI:3580629]
ENSMUSG00000030029	33.8702	13.423	1.33408	0.0465458	1	Lrig1	6	94604529	94700158	-	5585	protein_coding	Leucine-rich repeats and immunoglobulin-like domains protein 1 [Source:UniProtKB/Swiss-Prot;Acc:P70193]
ENSMUSG00000105462	18.9592	44.1295	-1.2159	0.0465651	1	Igkv4-77	6	69110904	69111432	-	352	IG_V_pseudogene	immunoglobulin kappa variable 4-77 [Source:MGI Symbol;Acc:MGI:3647937]
ENSMUSG00000079186	2.04097	13.2066	-2.69186	0.0478258	1	Gzmc	14	56231441	56234656	-	894	protein_coding	Granzyme C [Source:UniProtKB/Swiss-Prot;Acc:P08882]
ENSMUSG00000081118	5.17843	0	4.86821	0.0478285	1	Gm6758	X	74135133	74136187	-	1055	processed_pseudogene	predicted gene 6758 [Source:MGI Symbol;Acc:MGI:3643216]
ENSMUSG00000044067	0	5.24755	-4.79458	0.0480504	1	Gpr22	12	31706867	31713947	-	4608	protein_coding	Probable G-protein coupled receptor 22 [Source:UniProtKB/Swiss-Prot;Acc:Q8BZL4]
ENSMUSG00000085738	0	5.24755	-4.79458	0.0480504	1	Gm12335	11	75066436	75066762	-	327	processed_pseudogene	predicted gene 12335 [Source:MGI Symbol;Acc:MGI:3650727]
ENSMUSG00000096802	28.4054	57.7279	-1.02476	0.048177	0.239672	Gm15433	1	84963669	84964559	+	891	processed_pseudogene	predicted pseudogene 15433 [Source:MGI Symbol;Acc:MGI:3705860]
ENSMUSG00000076555	45.0371	93.0837	-1.04748	0.0486254	0.241624	Igkv4-57-1	6	69544359	69544907	-	373	IG_V_gene
ENSMUSG00000115002	1.01204	9.99509	-3.29253	0.0494361	1	AC135083.1	14	74926445	74933133	+	1331	antisense
ENSMUSG00000043126	5.5831	0	4.97935	0.049496	1	D830039M14Rik	10	61473576	61476937	-	3362	antisense
